# Supplementary material
Source: PubMed Central journal article supplement (PMC5749980)
Supplement: NIHMS922878-supplement-Supplemental.pdf [file NIHMS922878-supplement-Supplemental.pdf]

## Supplementary Figures

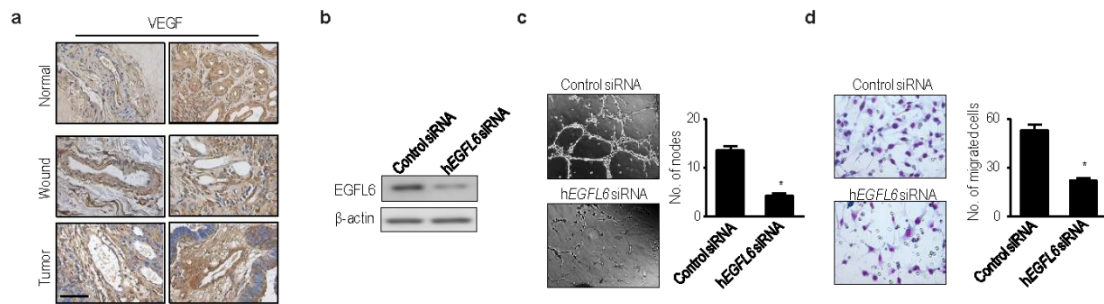

**Supplementary Fig. 1.**

**Supplementary Figure 1. Related to Figure 1. ; EGFL6 regulates tumor angiogenesis. a**, Expression of VEGF in human normal ovary, wound, and ovarian tumor samples. Representative images stained from different samples. Scale bar = 50  $\mu$ m. In **b**, Control siRNA- and *EGFL6* siRNA-treated RF24 cells characterize EGFL6 expression. **c-d**, Silencing of *EGFL6* using specific siRNA decrease tube formation (**c**) and migration (**d**). Migrated cells were examined at 400X magnification.

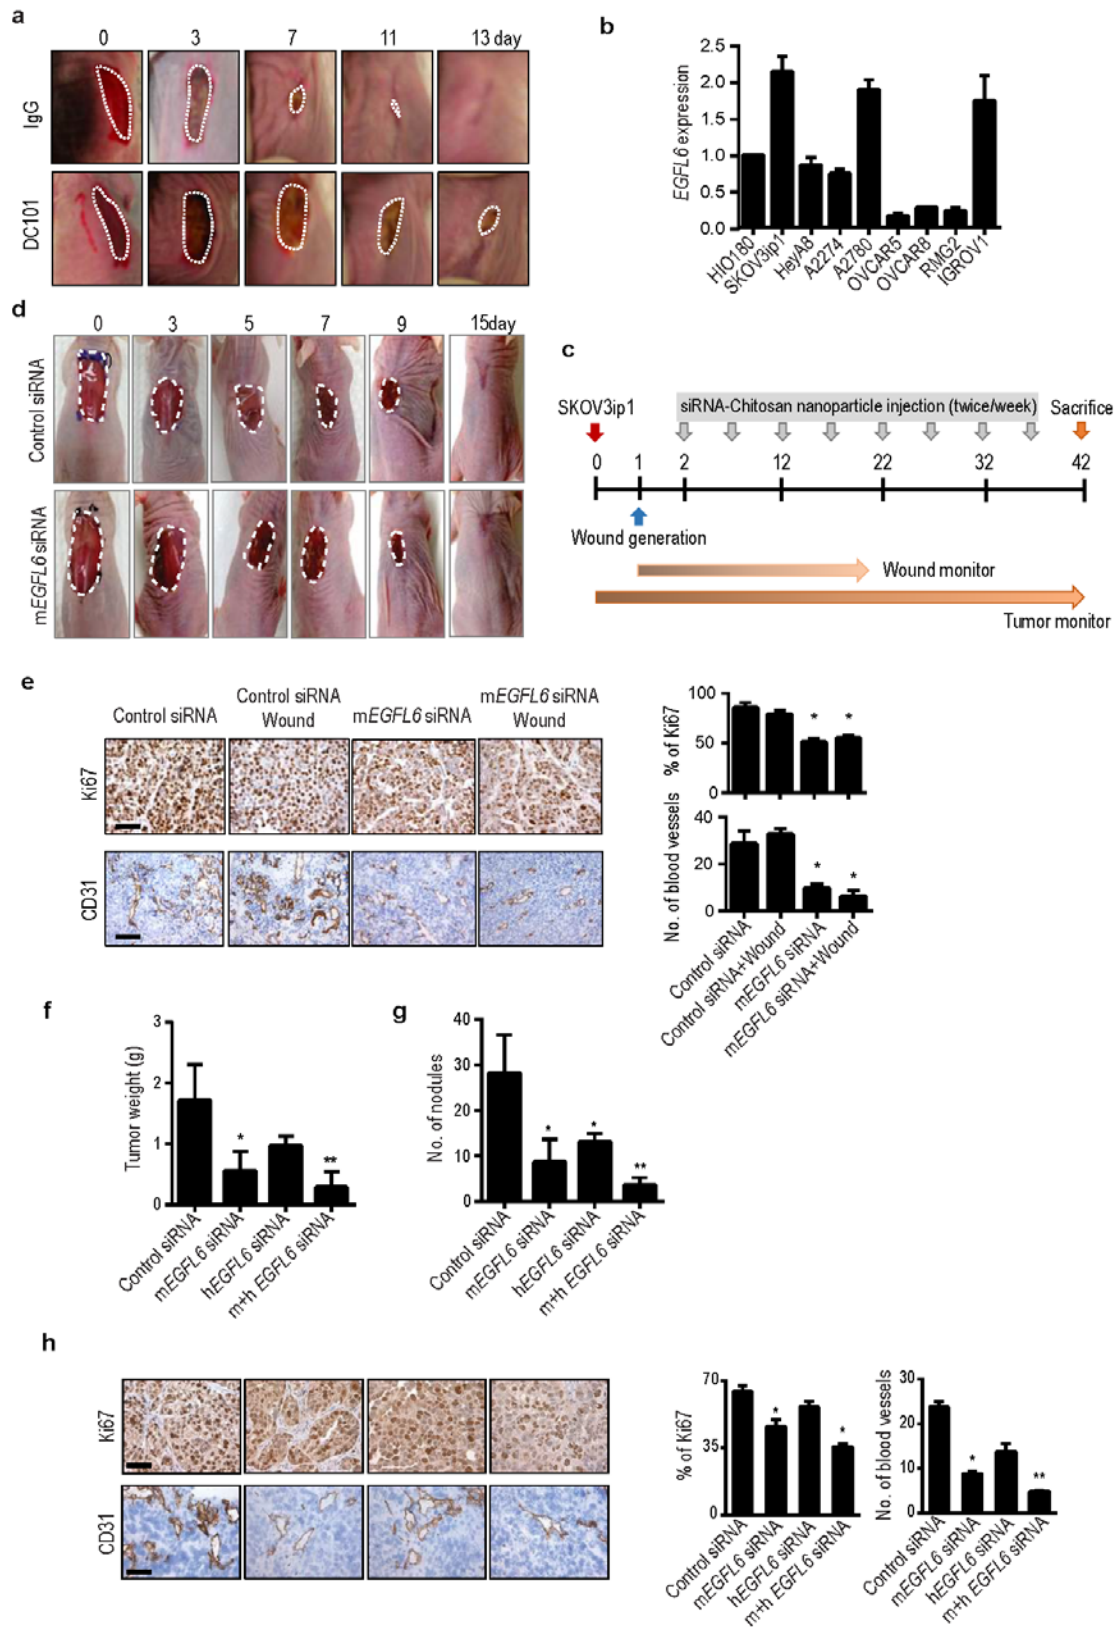

Supplementary Fig. 2.

**Supplementary Figure 2. Related to Figure 2. ; Silencing of EGFL6 decreases tumor proliferation. a,**

Pictures of representative wounds on mice treated with either control IgG antibody or DC101 (anti-VEGFR2).

**b,** Expression of *EGFL6* mRNA in human ovarian cancer cells. **c,** Schematic diagram of the SKOV3ip1 tumor

model, wound generation, and treatment regimen. **d,** Pictures of wounds on mice injected with SKOV3ip1 tumor cells and then wound was created on the dorsal side of the mice. Animals were treated with either Control siRNA-CH or *mEGFL6* siRNA-CH. Representative pictures of healing wounds in Control siRNA- and *mEGFL6* siRNA-treated mice. **e,** Animals were treated with either Control siRNA-CH or *mEGFL6* siRNA-CH

with or without wound. Harvested tumors were stained for Ki67 (proliferation) and CD31 (microvessel). Error bars indicate SEM. \* $p < 0.05$  vs. Control siRNA. **f and g,** Effects of endothelial cell (*mEGFL6* siRNA) or tumor (*hEGFL6* siRNA) targeted *EGFL6* siRNA on tumor weight and tumor nodules in SKOV3ip1 orthotopic mouse

model of ovarian cancer. Seven days after tumor cell injection, mice began receiving therapy: (1) Control siRNA, (2) *mEGFL6* siRNA, (3) *hEGFL6* siRNA, and (4) *mEGFL6* siRNA + *hEGFL6* siRNA. Mice were

ethanized when any animals in a control or treatment group became moribund. **h,** Effect of targeted *EGFL6*

siRNAs on proliferation and microvessel density. Harvested tumors were stained for Ki67 (proliferation) and

CD31 (microvessel). Scale bar = 50  $\mu\text{m}$ . The bars in the graphs correspond sequentially to the labeled columns of images on the left. Error bars indicate SEM. \* $p < 0.05$  vs. Control siRNA

**a**

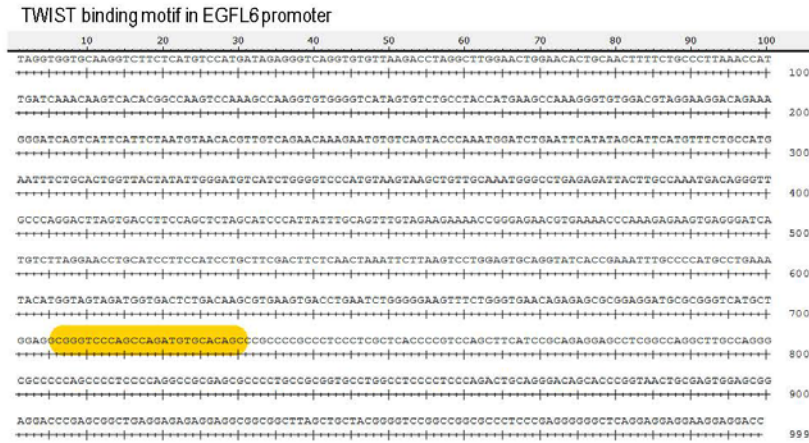

**b**

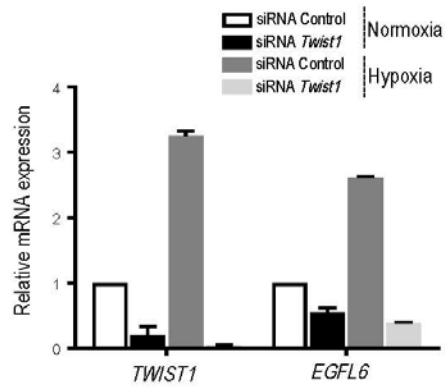

**Supplementary Fig.3.**

**Supplementary Figure 3. Related to Figure 3. ; TWIST1 binds to the EGFL6 promoter. a,** TWIST1 binding motif in EGFL6 promoter sequence. **b,** Expression of *TWIST1* and *EGFL6* mRNA in Control siRNA- or *TWIST1* siRNA-treated RF24 cells.

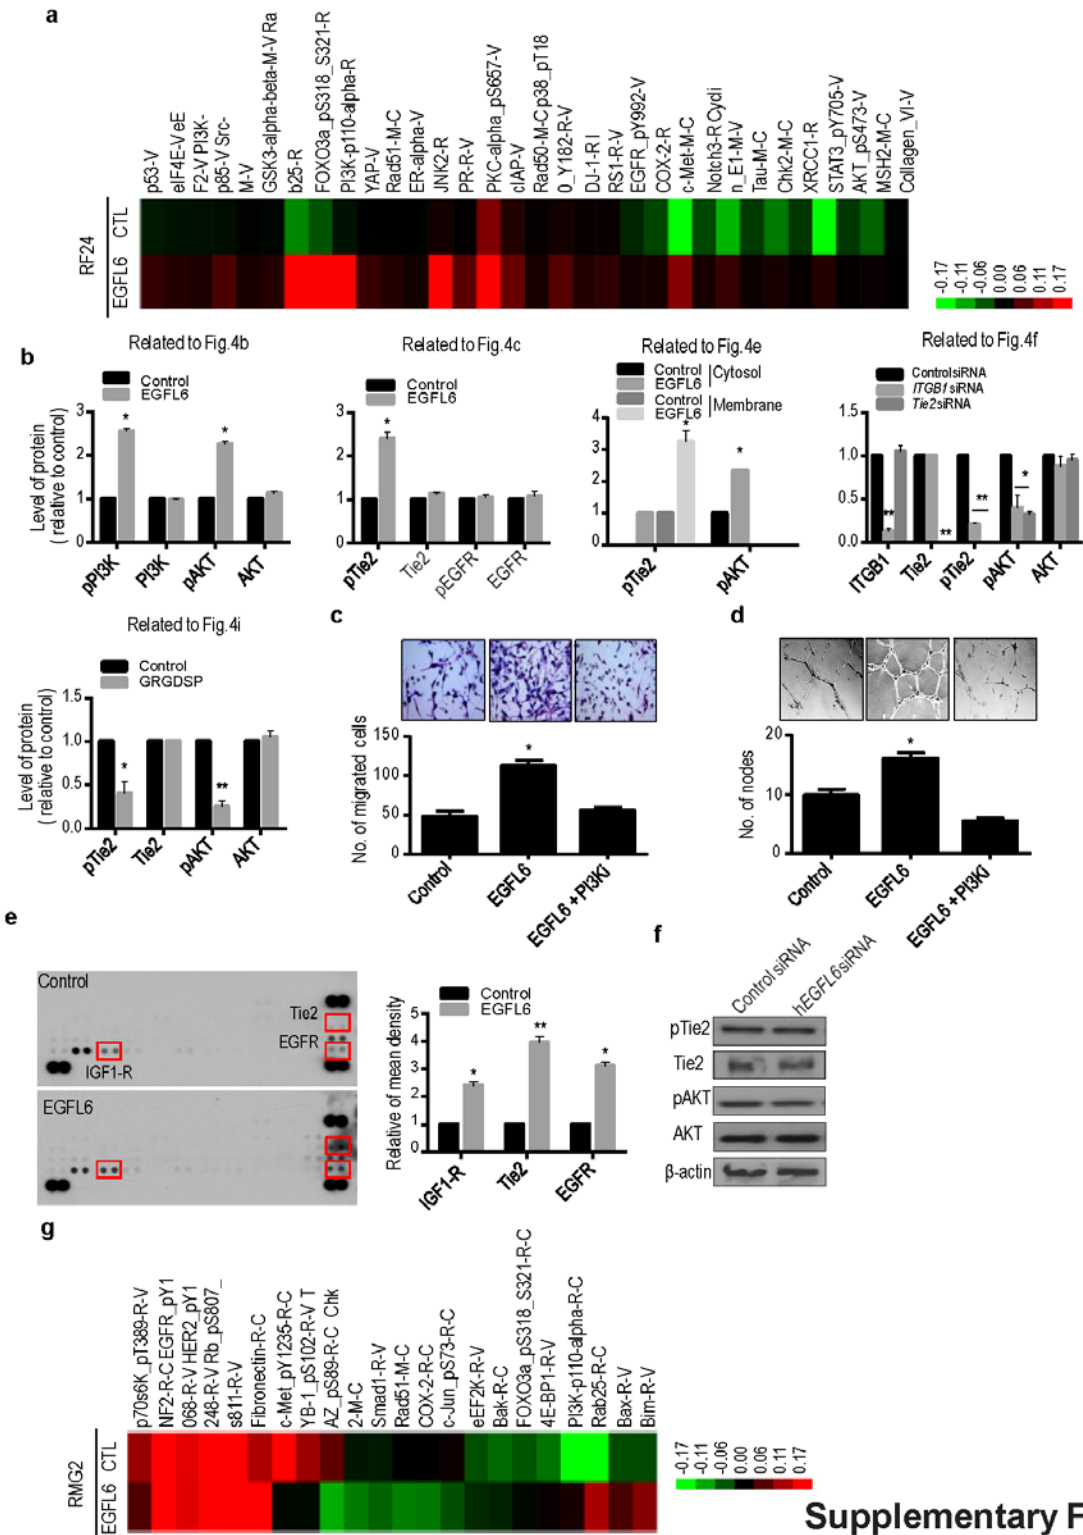

Supplementary Fig.4.

**Supplementary Figure 4. Related to Figure 4. ; Treatment of endothelial cells with EGFL6 activates PI3K/AKT signaling.** **a**, Heat map representation of RPPA analysis showing protein expression change in Control and EGFL6-treated RF24 endothelial cells. **b**, Bar graphs show quantification of protein expression. Error bars indicate SEM. **c** and **d**, EGFL6-mediated migration and tube formation (lower panel) was reduced by PI3K inhibition in endothelial cells. **e**, Human phosphorylated RTK arrays were used to examine EGFL6-induced RTK phosphorylation levels in RF24 cell lysates. **f**, Effect of *EGFL6* siRNA on Tie2/AKT activation in SKOV3ip1 ovarian cancer cells. **g**, Heat map representation of RPPA analysis showing protein expression change in vehicle and EGFL6-treated RMG2 ovarian cancer cells. \*\* $p < 0.005$ , \* $p < 0.05$

**a** Section of EGFL6 monoclonal antibody flow chart

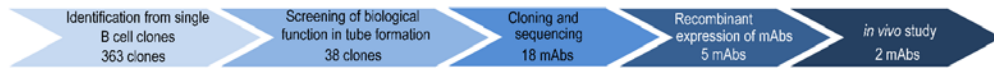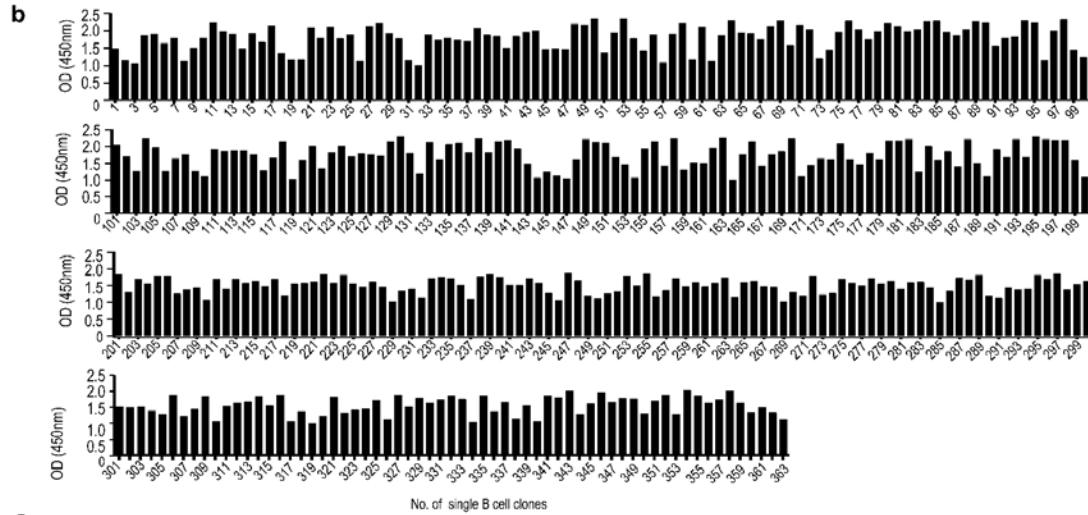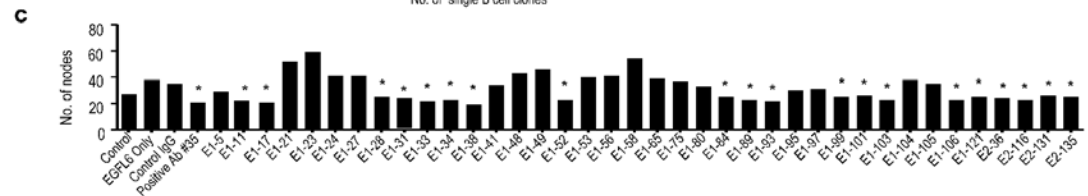

**d**

| mAb     | KD(M)    | kon(1/Ms) | kdis(1/s) | Rmax  | Full CHI <sup>2</sup> | Full R <sup>2</sup> |
|---------|----------|-----------|-----------|-------|-----------------------|---------------------|
| #93mAb  | 1.89E-09 | 1.11E+05  | 2.09E-04  | 0.249 | 0.0486                | 0.9976              |
| #135mAb | 2.19E-09 | 2.20E+05  | 4.82E-04  | 0.315 | 0.0955                | 0.9975              |

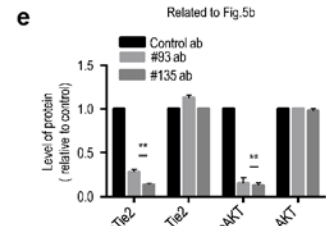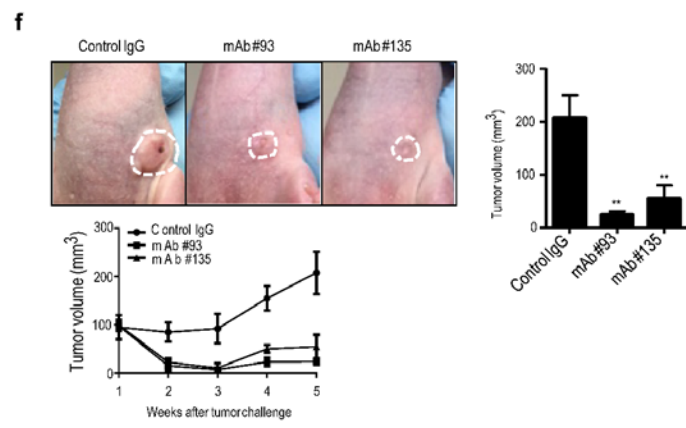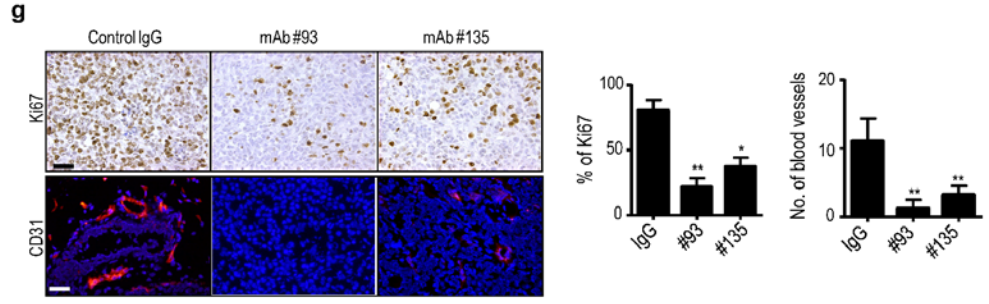

**Supplementary Fig.5.**

**Supplementary Figure 5. Related to Figure 5. ; Screening, binding affinity, and functional activity of EGFL6 antibodies.** **a**, Flowchart of generation and selection of EGFL6 monoclonal antibodies. **b**, Bar graphs represent EGFL6 binding signal of monoclonal antibody clones by ELISA. **c**, Bar graph is representative for tube formation of selected monoclonal antibodies. **d**, The kinetic constants of EGFL6 monoclonal antibodies (#93 and #135) were determined by Octet. Full  $\text{CHI}^2$  (sum of squared deviations; deviation measures the differences between the fitting curve and the actual data points) and the full  $\text{R}^2$  (coefficient of the determination; 1.0 is for perfect curve fit) suggest good fit for the determined kinetic constants. **e**, Bar graph shows inhibition of pTie2 and pAKT by the two lead EGFL6 antibodies. **f**, Effect of EGFL6 blocking antibodies on MDA-MB-231 tumor-bearing mice tumor volumes. Seven days after tumor cell injection in mammary fat pad, mice were randomly divided into three groups (10 mice/group) to receive therapy: (1) Control Ab IgG, (2) EGFL6 #93, and (3) EGFL6 Ab #135 (5 mg/kg). Antibody was given once a week. Representative images of breast cancer model treated with EGFL6 antibodies. **g**, Effect of targeted EGFL6 on proliferation (Ki67) and microvessel density (CD31). Scale bar = 100 $\mu\text{m}$ . Error bars indicate SEM. \* $p < 0.05$  vs. Control IgG.



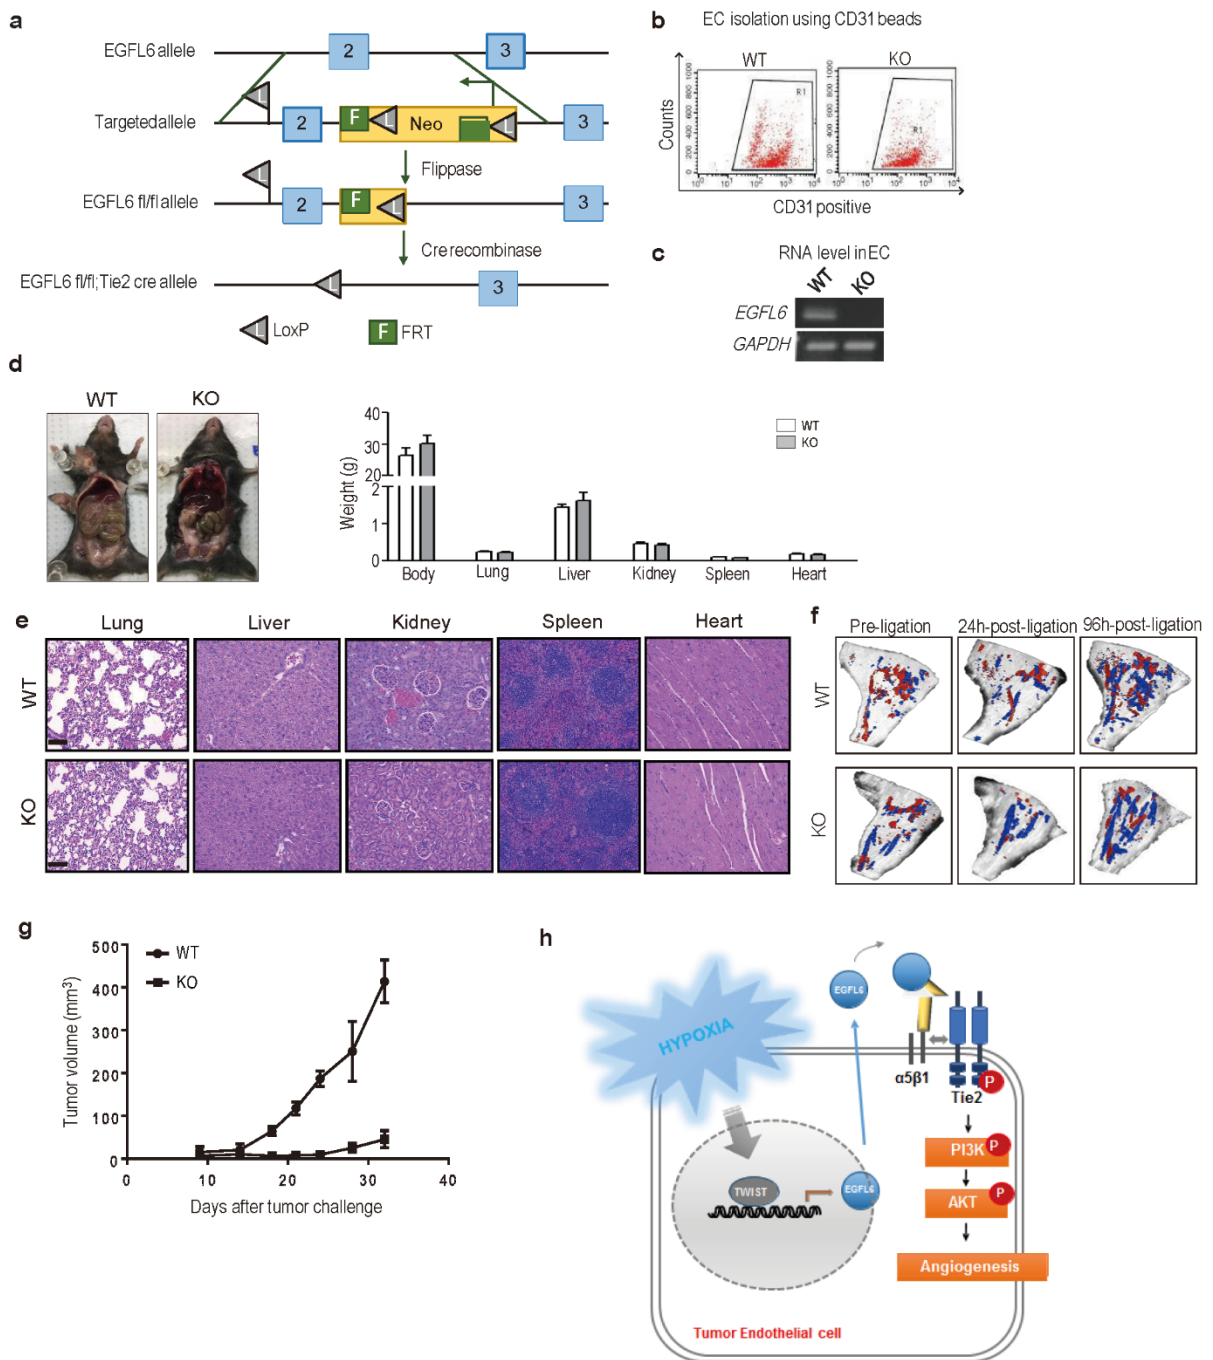

Supplementary Fig.6.

**Supplementary Figure 6. Related to Figure 6. ; Generation of *Tie2-cre; EGFL6<sup>ff</sup>* knockout mice. a,**

Schematic showing the 3 alleles of *EGFL6*. Excision of the neomycin resistance cassette by Flp recombinase produces the *EGFL6<sup>ff</sup>* floxed allele, which is expressed normally and *Tie2 cre;EGFL6<sup>ff</sup>* allele. Excision of exon2 from the *EGFL6<sup>ff</sup>* allele by Cre recombinase produces an *EGFL6 KO* allele. After deletion of exon 2, there are 4 stop codons predicted in exon 3 alone:

MQPPWGLALPLLLPWVTGGVGTSYV\*AQVQVR\*VCGTE\*M\*MLSRIHREDLHS, \*=stop codon. **b,** CD31

expression in isolated endothelial cells from *WT* and *KO* mice. **c,** *EGFL6* mRNA level in isolated endothelial cells. **d,** Representative gross images from *WT* and *KO* mice along with whole body, lung, liver, kidney, spleen, and heart weights in *WT* and *KO* mice (n=5). **e,** H&E stain of lung, liver, kidney, spleen, and heart tissues from *WT* and *KO* mice (n=5). Scale bar = 50  $\mu$ m **f,** Hind limb ischemia. After arterial ligation, *WT* and *KO* mice were assigned to the following groups (n = 5 mice per group): pre-ligated, 24h-post-ligated and 96h-post-ligated. Blood flow was monitored before and after femoral artery ligation with the use of serial laser Doppler. **g,** Tumor growth (volume) in the E0771 breast cancer model. Tumor cell injection was carried out in mammary fat pad of *WT* or *KO* mice (n = 5 mice per group). **h,** Schematic overview of the *EGFL6* signaling axis in tumor endothelial cells. In hypoxic tumor environment, TWIST1 regulates *EGFL6* expression which could bind to integrin  $\alpha 5\beta 1$  and facilitate crosstalk with Tie2 receptor. This triggers downstream signaling to promote tumor angiogenesis *via* the PI3K/AKT pathway.

**Supplementary Table 1. Related to Figure 6. ; Association of clinical and demographic features with vascular EGFL6 in epithelial ovarian carcinoma**

|               | EGFL6 overexpression       |     |         |
|---------------|----------------------------|-----|---------|
|               | No                         | Yes | p-value |
| Mean age      | 60.5 yrs (range 35-85 yrs) |     |         |
| Stage         |                            |     |         |
| Low (I/II)    | 13                         | 4   |         |
| High (III-IV) | 42                         | 71  | 0.002   |
| Grade         |                            |     |         |
| Low           | 5                          | 4   |         |
| High          | 50                         | 71  | 0.4     |
| Histology     |                            |     |         |
| Serous        | 42                         | 64  |         |
| Other         | 13                         | 11  | 0.19    |

**Supplementary Table 2.** quantitative-PCR primer lists

| No. | Primers                                | Sequence (5'-3')                       |
|-----|----------------------------------------|----------------------------------------|
| 1   | Murine EGFL6 F                         | 5'-AGATGTGAATGAGTGTGGAGTC-3'           |
| 2   | Murine EGFL6 R                         | 5'-AGTTTAGTCTGGCACACGTC-3'             |
| 3   | Human EGFL6 F                          | 5'-AGAAACAGCAAGGGAGTCTG-3'             |
| 4   | Human EGFL6 R                          | 5'-GGTTTCATTCCACACTCATTAC-3'           |
| 5   | TWIST1 F                               | 5'-5'-CATCCTCACACCTCTGCATT-3'          |
| 6   | TWIST1 R                               | 5'-GGCCAGTTTGTATCCAGTAT-3'             |
| 7   | EGFL6 promoter ChIP 1 F                | 5'-TCATGCTGGAGGCGGGTC-3'               |
| 8   | EGFL6 promoter ChIP 1 R                | 5'-GGCTCCTCTGCGGATGAAGC-3'             |
| 9   | EGFL6 promoter ChIP 2 F                | 5'-TCCTGGAGTGCAGGTATCAC-3'             |
| 10  | EGFL6 promoter ChIP 2 R                | 5'-GAAACTTCCCCCAGATTCAG-3'             |
| 11  | EGFL6 promoter ChIP negative<br>F      | 5'-TGGAAGTGAACACTGCAAC-3'              |
| 12  | EGFL6 promoter ChIP negative<br>R      | 5'-ACACCTTGGCTTTGGACTTG-3'             |
| 13  | F1551iNeoS F<br>(for EGFL6 genotyping) | 5'-GAGTGGTTGACACTTCACACTAC-3'          |
| 14  | R1551iNeoS R<br>(for EGFL6 genotyping) | 5'-GTCCTATTCTACTTTGTAGACAGACTACT TG-3' |
| 15  | Tie2 Cre transgene F                   | 5'-CGCATAACCAGTGAAACAGCATTGC-3'        |
| 16  | Tie2 Cre transgene R                   | 5'-CCCTGTGCTCAGACAGAAATGAGA-3'         |
